# Supplementary material
Source: PubMed Central journal article supplement (PMC521948)

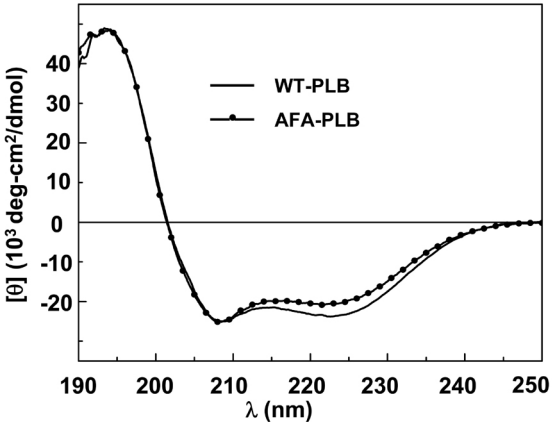

Supplement: pnas_101_40_14437__1.pdf [file pnas_101_40_14437__1.pdf]

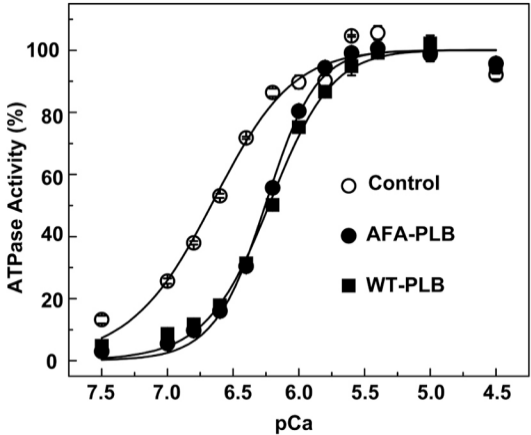

Supplement: pnas_101_40_14437__2.pdf [file pnas_101_40_14437__2.pdf]

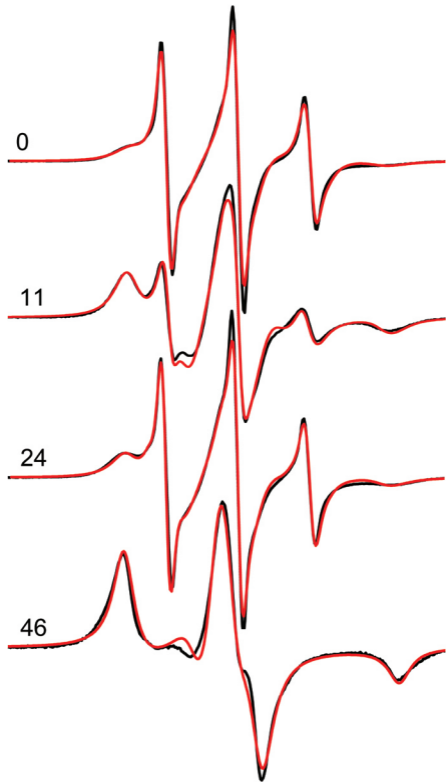

Supplement: pnas_101_40_14437__4.pdf [file pnas_101_40_14437__4.pdf]

PLB52-1

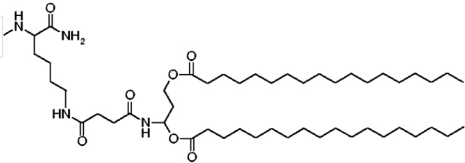

Supplement: pnas_101_40_14437__5.pdf [file pnas_101_40_14437__5.pdf]
